# Supplementary material for: Ubiquinol Ameliorates Endothelial Dysfunction in Subjects with Mild-to-Moderate Dyslipidemia: A Randomized Clinical Trial
Source: PubMed Central journal article supplement (PMC7231284; doi:10.3390/nu12041098), 2020-04-15
Supplement: nutrients-12-01098-s001.pdf [file nutrients-12-01098-s001.pdf]

**Table S1. Inclusion and exclusion criteria as defined by the study protocol**

| <b>Inclusion criteria</b>                                                                                                                                                                                                                                                                                                     |
|-------------------------------------------------------------------------------------------------------------------------------------------------------------------------------------------------------------------------------------------------------------------------------------------------------------------------------|
| Males aged 35 - 65 years (35 and 65 included)                                                                                                                                                                                                                                                                                 |
| Post-menopausal females (without menses for > 1 year) aged up to 65 years (65 included)                                                                                                                                                                                                                                       |
| Subjects recommended to adopt primary prevention but never treated (only lifestyle changes suggested as per current guidelines)                                                                                                                                                                                               |
| Screening FMD, 2.5-6.0%                                                                                                                                                                                                                                                                                                       |
| Body mass index (BMI) from 18.5 to 29.9 kg/m <sup>2</sup>                                                                                                                                                                                                                                                                     |
| LDL cholesterol from 130 to 200 mg/dL, measured within 1 month prior to the screening visit                                                                                                                                                                                                                                   |
| <b>Exclusion criteria</b>                                                                                                                                                                                                                                                                                                     |
| Any drugs to treat cardiovascular diseases prior to the screening visit                                                                                                                                                                                                                                                       |
| Concomitant participation in any clinical trial                                                                                                                                                                                                                                                                               |
| Change in body weight > 5% within one month of the screening visit                                                                                                                                                                                                                                                            |
| Participation in competitive physical sports                                                                                                                                                                                                                                                                                  |
| Lipid-lowering drugs or supplements – niacin (>100 mg/ day), garlic (> 600 mg/day), omega-3 fatty acids (> 1 g/day), red yeast rice extract, phytosterols / phytosterols (> 0.5 g/day), soluble fiber (>1 g/day), chitosan (> 1 g/day) and conjugated linoleic acid (> 3 g/day) – within 4 weeks prior to the screening visit |
| Phosphodiesterase inhibitors (e.g. sildenafil citrate, tadalafil, vardenafil) or nitric oxide donors, e.g. long-acting glyceryl trinitrate derivatives like. isosorbide dinitrate and amyl or butyl nitrite                                                                                                                   |
| Systemic corticosteroids (except nasal and inhaled corticosteroids), orlistat, bile acid resins, omega-3 fatty acids > 1 g, any hormone replacement therapy (estrogen or testosterone)                                                                                                                                        |
| Consumption of > 2 alcohol units per day; 1 unit: 12 g ethanol, e.g. a small glass (125 ml) of medium gradation wine, a can of beer (330 ml) of average gradation or 40 ml of liquors                                                                                                                                         |

|                                                                                                                                                                                                                                                                                 |
|---------------------------------------------------------------------------------------------------------------------------------------------------------------------------------------------------------------------------------------------------------------------------------|
| Flavonoid-enriched products                                                                                                                                                                                                                                                     |
| Vitamin C-enriched products or supplements containing vitamin C                                                                                                                                                                                                                 |
| A diagnosis of type 1 or type 2 diabetes mellitus, liver or kidney impairment or disease, thyroid disorders                                                                                                                                                                     |
| Known cardiovascular disease or stroke, except for conditions that are deemed clinically insignificant by the Principal Investigator, Sub-investigator, or the study site physician ( <i>e.g.</i> clinically insignificant atherosclerotic lesions observed by imaging studies) |
| History of significant gastrointestinal disease such as severe constipation, diarrhea, malabsorptive disease, inflammatory bowel disease ( <i>e.g.</i> Crohn's disease, ulcerative colitis)                                                                                     |
| A history of severe psychiatric illness which in the opinion of the Principal Investigator would interfere with optimal participation in the study                                                                                                                              |
| A recent (< 5 years) history of cancer (except for successfully treated basal and squamous cell carcinoma of the skin)                                                                                                                                                          |
| Known HIV seropositivity                                                                                                                                                                                                                                                        |
| A history of bariatric surgery                                                                                                                                                                                                                                                  |
| Allergy to the product or the placebo                                                                                                                                                                                                                                           |
| Smoking > 10 cigarettes/day                                                                                                                                                                                                                                                     |
| Risk of non-compliance with the study procedures or unsuitability for inclusion in the trial in the opinion of the Principal Investigator                                                                                                                                       |
